# Supplementary material
Source: HighWire-hosted journal article supplement (https://molpharm.aspetjournals.org/highwire/filestream/88389/field_highwire_adjunct_files/0/641_supp_table_2.xlsx)
Supplement: 641_supp_table_2.xlsx [file 641_supp_table_2.xlsx]

## Sheet: DEGs
MOLPHARM-AR-2022-000641
Multi-omics analyses identify PREPL as a key regulator of protein trafficking, a pathway underlying Alzheimer’s disease pathogenesis
Mariana Lemos Duarte*1,3, Minghui Wang*2, Ivone Gomes*1 Chenge Liu1,4, Ali Sharma 1,5, Amanda K. Fakira1,6, Achla Gupta1, Seshat Mack1, Bin Zhang2@, Lakshmi A. Devi1@
Supplemental Table 2. Gene ontology pathways enriched in the PREPL knock-down induced DEGs.
System	MSigDB	DEGs	Overlap Size	DEGs Size	MSigDB Size	Background Size	FE	P value	P adj	Genes
c5.go.bp	GOBP_STEROL_METABOLIC_PROCESS	Down	25	206	113	13762	14.8	1.35266e-22	2.24857e-18	Acat2; Acly; Cat; Cln6; Cyb5r3; Cyp51; Dhcr7; Ebp; Fdft1; Hmgcr; Hmgcs1; Hsd17b7; Idi1; Insig1; Ldlr; Lss; Mvd; Mvk; Npc2; Nsdhl; Pmvk; Soat1; Sqle; Srebf1; Srebf2
c2.cp	WP_CHOLESTEROL_METABOLISM_INCLUDES_BOTH_BLOCH_AND_KANDUTSCHRUSSELL_PATHWAYS	Down	18	206	42	13762	28.6	1.7326e-22	2.24857e-18	Cyp51; Dhcr7; Ebp; Fads2; Fdft1; Hmgcr; Hmgcs1; Hsd17b7; Idi1; Lss; Mvd; Mvk; Nsdhl; Pmvk; Soat1; Sqle; Srebf1; Srebf2
c2.cp	REACTOME_CHOLESTEROL_BIOSYNTHESIS	Down	15	206	24	13762	41.8	2.94811e-22	2.55071e-18	Acat2; Cyp51; Dhcr7; Ebp; Fdft1; Hmgcr; Hmgcs1; Hsd17b7; Idi1; Lss; Mvd; Mvk; Nsdhl; Pmvk; Sqle
c5.go.bp	GOBP_STEROL_BIOSYNTHETIC_PROCESS	Down	20	206	63	13762	21.2	9.62382e-22	6.2449e-18	Acat2; Acly; Cyb5r3; Cyp51; Dhcr7; Ebp; Fdft1; Hmgcr; Hmgcs1; Hsd17b7; Idi1 ;Insig1 ;Lss; Mvd; Mvk; Nsdhl; Pmvk; Sqle; Srebf1; Srebf2
c5.go.bp	GOBP_ALCOHOL_METABOLIC_PROCESS	Down	32	206	240	13762	8.9	1.58955e-21	8.25168e-18	Acat2; Acly; Acss2; Cat; Cln6; Cyb5r3; Cyp51; Dbh; Dhcr7; Ebp; Fdft1; Hmgcr; Hmgcs1; Hsd17b7; Idh1; Idh3g; Idi1; Impa2; Inpp4a; Insig1; Ldlr; Lss; Mvd; Mvk; Npc2; Nsdhl; Park7; Pmvk; Soat1; Sqle; Srebf1; Srebf2
c5.go.bp	GOBP_ALCOHOL_BIOSYNTHETIC_PROCESS	Down	23	206	111	13762	13.8	3.60395e-20	1.48791e-16	Acat2; Acly; Cyb5r3; Cyp51; Dbh; Dhcr7; Ebp; Fdft1; Hmgcr; Hmgcs1; Hsd17b7; Idi1; Impa2; Insig1; Lss; Mvd; Mvk; Nsdhl; Park7; Pmvk; Sqle; Srebf1; Srebf2
c2.cp	WP_CHOLESTEROL_BIOSYNTHESIS_PATHWAY	Down	12	206	15	13762	53.4	4.0127e-20	1.48791e-16	Cyp51; Dhcr7; Fdft1; Hmgcr; Hmgcs1; Idi1; Lss; Mvd; Mvk; Nsdhl; Pmvk; Sqle
c5.go.bp	GOBP_STEROID_METABOLIC_PROCESS	Down	27	206	177	13762	10.2	7.77252e-20	2.52179e-16	Acat2; Acly; Cat; Cln6; Cyb5r3; Cyp51; Dhcr7; Ebp; Fdft1; Hmgcr; Hmgcs1; Hsd17b7; Idi1; Insig1; Ldlr; Lss; Mvd; Mvk; Npc2; Nsdhl; Pbx1; Pmvk; Soat1; Sqle; Srebf1; Srebf2; Stard4
c5.go.bp	GOBP_STEROID_BIOSYNTHETIC_PROCESS	Down	22	206	115	13762	12.8	1.53761e-18	4.43446e-15	Acat2; Acly; Cyb5r3; Cyp51; Dhcr7; Ebp; Fdft1; Hmgcr; Hmgcs1; Hsd17b7; Idi1; Insig1; Lss; Mvd; Mvk; Nsdhl; Pbx1; Pmvk; Sqle; Srebf1; Srebf2; Stard4
c5.go.bp	GOBP_ORGANIC_HYDROXY_COMPOUND_ METABOLIC_PROCESS	Down	33	206	332	13762	6.6	3.57445e-18	9.27785e-15	Acat2; Acly; Acss2; Cat; Cln6; Cyb5r3; Cyp51; Dbh; Dhcr7; Ebp; Fdft1; Hmgcr; Hmgcs1; Hsd17b7; Idh1; Idh3g; Idi1; Impa2; Inpp4a; Insig1; Ldlr; Lss; Mvd; Mvk; Npc2; Nsdhl; Park7; Pmvk; Soat1; Sqle; Srebf1; Srebf2; Stard4
c5.go.bp	GOBP_ORGANIC_HYDROXY_COMPOUND_ BIOSYNTHETIC_PROCESS	Down	24	206	163	13762	9.8	2.28479e-17	5.39127e-14	Acat2; Acly; Cyb5r3; Cyp51; Dbh; Dhcr7; Ebp; Fdft1; Hmgcr; Hmgcs1; Hsd17b7; Idi1; Impa2; Insig1; Lss; Mvd; Mvk; Nsdhl; Park7; Pmvk; Sqle; Srebf1; Srebf2; Stard4
c5.go.bp	GOBP_SMALL_MOLECULE_BIOSYNTHETIC_ PROCESS	Down	36	206	457	13762	5.3	1.74048e-16	3.76467e-13	Aacs; Acat2; Acly; Acss2; Ass1; Cyb5r3; Cyp51; Dbh; Dera; Dhcr7; Ebp; Fads2; Fdft1; Glud1; Hmgcr; Hmgcs1; Hsd17b7; Idi1; Impa2; Insig1; Lss; Mvd; Mvk; Naalad2; Neil1; Nsdhl; Park7; Pcx; Pgd; Pmvk; Sqle; Srebf1; Srebf2; Stard4; Sucla2; Tkt
c5.go.bp	GOBP_SMALL_MOLECULE_METABOLIC_ PROCESS	Down	59	206	1245	13762	3.2	3.57041e-16	7.12873e-13	Aacs; Acat2; Acly; Acss2; Ak1; Ass1; Cat; Cln6; Cyb5r3; Cyp51; Dbh; Dera; Dhcr7; Ebp; Esd; Fads2; Fdft1; Gale; Gcat; Glo1; Glud1; Gpld1; Hmgcr; Hmgcs1; Hsd17b7; Idh1; Idh3g; Idi1; Impa2; Inpp4a; Insig1; Khk; Ldlr; Lss; Man2c1; Mvd; Mvk; Naalad2; Neil1; Npc2; Nsdhl; Ogdhl; Park7; Pcx; Pdhb; Pgd; Pmvk; Psmc1; Psmc6; Renbp; Scpep1; Soat1; Sqle; Srebf1; Srebf2; Stard4; Sucla2; Tkt; Uap1
c2.cp	REACTOME_METABOLISM_OF_STEROIDS	Down	19	206	101	13762	12.6	5.13226e-16	9.5152e-13	Acat2; Cyp51; Dhcr7; Ebp; Fdft1; Hmgcr; Hmgcs1; Hsd17b7; Idi1; Insig1; Lss; Mvd; Mvk; Nsdhl; Pmvk; Sqle; Srebf1; Srebf2; Stard4
c5.go.bp	GOBP_REGULATION_OF_STEROID_ BIOSYNTHETIC_PROCESS	Down	15	206	61	13762	16.4	9.78964e-15	1.694e-11	Cyp51; Dhcr7; Fdft1; Hmgcr; Hmgcs1; Idi1; Insig1; Lss; Mvd; Mvk; Pmvk; Sqle; Srebf1; Srebf2; Stard4
c5.go.bp	GOBP_REGULATION_OF_CHOLESTEROL_ BIOSYNTHETIC_PROCESS	Down	13	206	40	13762	21.7	1.09279e-14	1.77278e-11	Cyp51; Dhcr7; Fdft1; Hmgcr; Hmgcs1; Idi1; Lss; Mvd; Mvk; Pmvk; Sqle; Srebf1; Srebf2
c2.cp	REACTOME_ACTIVATION_OF_GENE_ EXPRESSION_BY_SREBF_SREBP	Down	13	206	41	13762	21.2	1.57931e-14	2.41132e-11	Cyp51; Dhcr7; Fdft1; Hmgcr; Hmgcs1; Idi1; Lss; Mvd; Mvk; Pmvk; Sqle; Srebf1; Srebf2
c2.cp	REACTOME_REGULATION_OF_CHOLESTEROL_BIOSYNTHESIS_BY_SREBP_SREBF	Down	14	206	54	13762	17.3	3.48816e-14	5.02992e-11	Cyp51; Dhcr7; Fdft1; Hmgcr; Hmgcs1; Idi1; Insig1; Lss; Mvd; Mvk; Pmvk; Sqle; Srebf1; Srebf2
c5.go.bp	GOBP_REGULATION_OF_LIPID_BIOSYNTHETIC_PROCESS	Down	19	206	130	13762	9.8	6.50209e-14	8.88254e-11	Cyp51; Dhcr7; Fdft1; Gpld1; Hmgcr; Hmgcs1; Idh1; Idi1; Insig1; Ldlr; Lss; Mvd; Mvk; Pmvk; Sqle; Srebf1; Srebf2; Stard4; Thrsp
c5.go.bp	GOBP_REGULATION_OF_CHOLESTEROL_ METABOLIC_PROCESS	Down	13	206	48	13762	18.1	1.5775e-13	2.04728e-10	Cyp51; Dhcr7; Fdft1; Hmgcr; Hmgcs1; Idi1; Lss; Mvd; Mvk; Pmvk; Sqle; Srebf1; Srebf2
c5.go.bp	GOBP_REGULATION_OF_STEROID_METABOLIC_PROCESS	Down	15	206	75	13762	13.4	2.63324e-13	3.25469e-10	Cyp51; Dhcr7; Fdft1; Hmgcr; Hmgcs1; Idi1; Insig1; Lss; Mvd; Mvk; Pmvk; Sqle; Srebf1; Srebf2; Stard4
c2.cp	KEGG_STEROID_BIOSYNTHESIS	Down	9	206	16	13762	37.6	3.31004e-13	3.90524e-10	Cyp51; Dhcr7; Ebp; Fdft1; Hsd17b7; Lss; Nsdhl; Soat1; Sqle
c5.go.bp	GOBP_REGULATION_OF_ALCOHOL_ BIOSYNTHETIC_PROCESS	Down	13	206	53	13762	16.4	6.44294e-13	7.271e-10	Cyp51; Dhcr7; Fdft1; Hmgcr; Hmgcs1; Idi1; Lss; Mvd; Mvk; Pmvk; Sqle; Srebf1; Srebf2
c5.go.bp	GOBP_LIPID_BIOSYNTHETIC_PROCESS	Down	31	206	481	13762	4.3	5.69863e-12	6.16307e-09	Acat2; Acly; Acss2; Cyb5r3; Cyp51; Ddhd1; Dhcr7; Ebp; Fads2; Fdft1; Gpld1; Hmgcr; Hmgcs1; Hsd17b7; Idh1; Idi1; Inpp4a; Insig1; Ldlr; Lss; Mvd; Mvk; Nsdhl; Pbx1; Pcyt2; Pmvk; Sqle; Srebf1; Srebf2; Stard4; Thrsp
c2.cp	WP_STEROL_REGULATORY_ELEMENT BINDING_PROTEINS_SREBP_SIGNALLING	Down	13	206	63	13762	13.8	7.0306e-12	7.29945e-09	Acly; Cyp51; Fdft1; Hmgcr; Hmgcs1; Idi1; Insig1; Ldlr; Lss; Mvd; Sqle; Srebf1; Srebf2
c2.cp	WP_MEVALONATE_PATHWAY	Down	6	206	7	13762	57.3	7.2332e-11	7.22096e-08	Acat2; Hmgcr; Hmgcs1; Mvd; Mvk; Pmvk
c5.go.bp	GOBP_LIPID_METABOLIC_PROCESS	Down	40	206	894	13762	3	3.18496e-10	3.06181e-07	Aacs; Acat2; Acly; Acss2; Cat; Cln6; Cyb5r3; Cyp51; Ddhd1; Dhcr7; Ebp; Fads2; Fdft1; Gm2a; Gpld1; Hmgcr; Hmgcs1; Hsd17b7; Idh1; Idi1; Impa2; Inpp4a; Insig1; Ldlr; Lss; Mvd; Mvk; Npc2; Nsdhl; Pbx1; Pcx; Pcyt2; Pmvk; Scpep1; Soat1; Sqle; Srebf1; Srebf2; Stard4; Thrsp
c2.cp	KEGG_TERPENOID_BACKBONE_BIOSYNTHESIS	Down	7	206	14	13762	33.4	4.77585e-10	4.42721e-07	Acat2; Hmgcr; Hmgcs1; Idi1; Mvd; Mvk; Pmvk
c2.cp	REACTOME_METABOLISM_OF_LIPIDS	Down	29	206	512	13762	3.8	6.32784e-10	5.66363e-07	Aacs; Acat2; Acly; Cyp51; Ddhd1; Dhcr7; Ebp; Fads2; Fdft1; Gm2a; Hmgcr; Hmgcs1; Hsd17b7; Idi1; Inpp4a; Insig1; Lss; Med30; Mvd; Mvk; Nsdhl; Pcyt2; Plin3; Pmvk; Sqle; Srebf1; Srebf2; Stard4; Thrsp
c5.go.bp	GOBP_REGULATION_OF_LIPID_METABOLIC_ PROCESS	Down	20	206	265	13762	5	2.94206e-09	2.54547e-06	Cyp51 ;Dhcr7; Fdft1; Gpld1; Hmgcr; Hmgcs1; Idh1; Idi1; Insig1; Ldlr; Lss; Mvd; Mvk; Npc2; Pmvk; Sqle; Srebf1; Srebf2; Stard4; Thrsp
c5.go.bp	GOBP_ISOPRENOID_BIOSYNTHETIC_PROCESS	Down	7	206	19	13762	24.6	6.57963e-09	5.50906e-06	Hmgcr; Hmgcs1; Idi1; Lss; Mvd; Mvk; Pmvk
c5.go.bp	GOBP_REGULATION_OF_SMALL_MOLECULE_METABOLIC_PROCESS	Down	20	206	308	13762	4.3	3.76532e-08	3.05414e-05	Cyp51; Dhcr7; Fdft1; Gpld1; Hmgcr; Hmgcs1; Idi1; Insig1; Khk; Lss; Mvd; Mvk; Park7; Pmvk; Psmc1; Psmc6; Sqle; Srebf1; Srebf2; Stard4
c5.go.bp	GOBP_ISOPENTENYL_DIPHOSPHATE_ BIOSYNTHETIC_PROCESS	Down	4	206	4	13762	66.8	4.87765e-08	3.83649e-05	Idi1; Mvd; Mvk; Pmvk
c5.go.bp	GOBP_ISOPRENOID_METABOLIC_PROCESS	Down	10	206	68	13762	9.8	6.19984e-08	4.73303e-05	Fdft1; Hmgcr; Hmgcs1; Idi1; Lss; Mvd; Mvk; Npc2; Pmvk; Scpep1
c5.go.bp	GOBP_CELLULAR_LIPID_METABOLIC_PROCESS	Down	30	206	681	13762	2.9	1.00344e-07	7.44153e-05	Aacs; Acat2; Acly; Acss2; Cat; Cln6; Ddhd1; Fads2; Fdft1; Gm2a; Gpld1; Hmgcr; Hmgcs1; Idh1; Idi1; Impa2; Inpp4a; Insig1; Ldlr; Lss; Mvd; Mvk; Npc2; Pcyt2; Pmvk; Scpep1; Soat1; Srebf1; Stard4; Thrsp
c2.cp	KEGG_CITRATE_CYCLE_TCA_CYCLE	Down	7	206	28	13762	16.7	1.37899e-07	9.94248e-05	Acly; Idh1; Idh3g; Ogdhl; Pcx; Pdhb; Sucla2
c5.go.bp	GOBP_ACETYL_COA_METABOLIC_PROCESS	Down	7	206	29	13762	16.1	1.79481e-07	0.000125909	Acly; Acss2; Hmgcs1; Mvd; Mvk; Pdhb; Pmvk
c5.go.cc	GOCC_VESICLE_LUMEN	Down	16	206	220	13762	4.9	1.99729e-07	0.000136425	Acly; Cat; Cnn2; Cyb5r3; Dbh; Dera; F5; Gm2a; Hsp90ab1; Hspa8; Idh1; Ilf2; Maged2; Npc2; Prdx4; Vcl
c5.go.mf	GOMF_IDENTICAL_PROTEIN_BINDING	Down	43	206	1314	13762	2.2	6.42949e-07	0.000427908	Anxa6; Ass1; Bex3; Bok; C1qtnf6; C1ra; Camk2a; Cat; Cln6; Dapk1; Des; Ebp; Esd; Ets1; Ezr; Gale; Glud1; Hmgcs1; Hsp90ab1; Hspb6; Idh1; Impa2; Ldlr; Maged1; Mvd; Mvk; Oxa1l; P2rx4; Park7; Pcx; Pnma5; Psmc6; Rasal3; Renbp; Ruvbl2; S100a6; Sav1; Sod2; Thrsp; Tkt; Tpd52l1; Tubg1; Uap1
c5.go.bp	GOBP_TRICARBOXYLIC_ACID_METABOLIC_ PROCESS	Down	5	206	13	13762	25.7	8.35731e-07	0.000542306	Acly; Ass1; Glud1; Idh1; Idh3g
c5.go.mf	GOMF_OXIDOREDUCTASE_ACTIVITY	Down	23	206	481	13762	3.2	8.85802e-07	0.000560778	Aldh9a1; Cat; Cox6b1; Cyb5r3; Cyp51; Dbh; Dhcr7; Fads2; Glud1; Hmgcr; Hsd17b7; Idh1; Idh3g; Msrb1; Ndufa8; Nsdhl; Ogdhl; Park7; Pdhb; Pgd; Prdx4; Sod2; Sqle
c2.cp	WP_STATIN_PATHWAY	Down	5	206	14	13762	23.9	1.28424e-06	0.0007752	Fdft1 ;Hmgcr; Ldlr; Soat1; Sqle
c2.cp	WP_SREBF_AND_MIR33_IN_CHOLESTEROL_ AND_LIPID_HOMEOSTASIS	Down	5	206	14	13762	23.9	1.28424e-06	0.0007752	Hmgcr; Hmgcs1; Ldlr; Srebf1; Srebf2
c2.cp	WP_CHOLESTEROL_BIOSYNTHESIS_WITH_ SKELETAL_DYSPLASIAS	Down	4	206	7	13762	38.2	1.64775e-06	0.000972022	Cyp51; Dhcr7; Ebp; Nsdhl
c5.go.bp	GOBP_NERVOUS_SYSTEM_PROCESS	Up	24	219	506	13762	3	1.76635e-06	0.00101883	Ager; Aoc2; Cacng4; Cnga3; Col11a2; Gpr179; Kalrn; Kcnk4; Kcnq4; Meis2; Mmp24; Nfasc; P2rx3; Ppp1r9a; Rdh5; Rorb; Scn5a; Serpinf1; Shank1; Shank3; Slc7a11; Tbx1; Tnr; Trpm8
c5.go.bp	GOBP_CELLULAR_ALDEHYDE_METABOLIC_ PROCESS	Down	7	206	41	13762	11.4	2.22017e-06	0.00125275	Aldh9a1; Esd; Glo1; Idh1; Khk; Park7; Tkt
c2.cp	BIOCARTA_S1P_PATHWAY	Down	4	206	8	13762	33.4	3.25684e-06	0.00179861	Hmgcs1; Ldlr; Srebf1; Srebf2
c5.go.cc	GOCC_FICOLIN_1_RICH_GRANULE_LUMEN	Down	10	206	104	13762	6.4	3.48677e-06	0.00188547	Acly; Cat; Ctsb; Dera; Hsp90ab1; Hspa8; Idh1; Ilf2; Prdx4; Vcl
c2.cp	KEGG_PYRUVATE_METABOLISM	Down	6	206	30	13762	13.4	4.60151e-06	0.00243749	Acat2; Acss2; Aldh9a1; Glo1; Pcx; Pdhb
c5.go.cc	GOCC_INTRINSIC_COMPONENT_OF_PLASMA_MEMBRANE	Up	29	219	736	13762	2.5	5.76828e-06	0.00299443	Ager; Atp1b1; Cacng4; Cd82; Cxadr; Dscam; Flrt1; Hcn4; Il6st; Kcnj14; Kcnj6; Kcnk4; Kcnq4; Mmd; Mmp24; Nfasc; Ntrk3; P2rx3; Podxl; Ptprh; Ptprs; Scn5a; Shank1; Shank3; Slc16a12; Steap1; Syt7; Trpm8; Tspan4
c5.go.bp	GOBP_MULTICELLULAR_ORGANISMAL_ SIGNALING	Up	10	219	107	13762	5.9	7.75966e-06	0.00394921	Atp1b1; Cacng4; Cxadr; Hcn4; Kcnj14; Nfasc; P2rx3; Ryr2; Scn5a; Tnr
c5.go.cc	GOCC_TRANSPORTER_COMPLEX	Up	12	219	158	13762	4.8	8.35377e-06	0.00416982	Atp1b1; Cacng4; Cnga3; Hcn4; Kcnj14; Kcnj6; Kcnk4; Kcnq4; Ryr2; Scn5a; Shank1; Shank3
c5.go.bp	GOBP_ORGANIC_ACID_METABOLIC_PROCESS	Down	26	206	680	13762	2.6	1.0343e-05	0.00501347	Aacs; Acat2; Acly; Acss2; Ass1; Cyb5r3; Fads2; Gcat; Glo1; Glud1; Idh1; Idh3g; Insig1; Naalad2; Ogdhl; Park7; Pcx; Pdhb; Pgd; Psmc1; Psmc6; Renbp; Scpep1; Srebf1; Stard4; Sucla2
c5.go.bp	GOBP_AEROBIC_RESPIRATION	Down	8	206	71	13762	7.5	1.04302e-05	0.00501347	Cat; Cox6b1; Idh1; Idh3g; Ogdhl; Oxa1l; Pdhb; Sucla2
c5.go.bp	GOBP_RESPONSE_TO_STEROL	Down	5	206	21	13762	15.9	1.19844e-05	0.00565574	Aacs; Gpld1; Hmgcs1; Insig1; Pmvk
c5.go.mf	GOMF_PASSIVE_TRANSMEMBRANE_ TRANSPORTER_ACTIVITY	Up	13	219	193	13762	4.2	1.2951e-05	0.00600279	Cacng4; Cnga3; Hcn4; Kcnj14; Kcnj6; Kcnk4; Kcnq4; P2rx3; Panx2; Ryr2; Scn5a; Steap1; Trpm8
c5.go.bp	GOBP_NUCLEOSIDE_BISPHOSPHATE_ METABOLIC_PROCESS	Down	9	206	96	13762	6.3	1.33338e-05	0.0060718	Acly; Acss2; Hmgcr; Hmgcs1; Mvd; Mvk; Pdhb; Pmvk; Sucla2
c5.go.mf	GOMF_LIGAND_GATED_CATION_CHANNEL_ ACTIVITY	Up	7	219	51	13762	8.6	1.49968e-05	0.00671133	Cnga3 ;Hcn4; Kcnj14; Kcnj6; P2rx3; Ryr2; Trpm8
c5.go.bp	GOBP_THIOESTER_METABOLIC_PROCESS	Down	8	206	75	13762	7.1	1.57151e-05	0.0067985	Acly; Acss2; Hmgcs1; Mvd; Mvk; Pdhb; Pmvk; Sucla2
c5.go.bp	GOBP_SOFT_PALATE_DEVELOPMENT	Up	3	219	4	13762	47.1	1.57154e-05	0.0067985	Col11a2; Sox11; Tbx1
c5.go.bp	GOBP_LIPID_STORAGE	Down	7	206	55	13762	8.5	1.67844e-05	0.00714189	Gm2a; Plin3; Soat1; Sqle; Srebf1; Srebf2; Stard4
c5.go.mf	GOMF_GATED_CHANNEL_ACTIVITY	Up	11	219	143	13762	4.8	1.77117e-05	0.00741491	Cacng4; Cnga3; Hcn4; Kcnj14; Kcnj6; Kcnk4; Kcnq4; P2rx3; Ryr2; Scn5a; Trpm8
c5.go.bp	GOBP_CARBOHYDRATE_DERIVATIVE_ METABOLIC_PROCESS	Down	27	206	750	13762	2.4	2.03211e-05	0.00837231	Acly; Acss2; Ak1; Cln6; Dera; Galnt15; Gm2a; Gpld1; Hmgcr; Hmgcs1; Itm2b; Khk; Magt1; Mvd; Mvk; Neil1; Ogdhl; Park7; Pdhb; Pgd; Pmvk; Renbp; Rpn2; Soat1; Sucla2; Tkt; Uap1
c5.go.mf	GOMF_CATION_CHANNEL_ACTIVITY	Up	11	219	147	13762	4.7	2.29471e-05	0.00930648	Cacng4; Cnga3; Hcn4; Kcnj14; Kcnj6; Kcnk4; Kcnq4; P2rx3; Ryr2; Scn5a; Trpm8
c5.go.bp	GOBP_ORGANOPHOSPHATE_METABOLIC_ PROCESS	Down	26	206	713	13762	2.4	2.35518e-05	0.00940477	Acly;Acss2;Ak1;Ddhd1;Dera;Fdft1;Gpld1;Hmgcr;Hmgcs1;Idh1;Idi1;Impa2;Inpp4a;Khk;Ldlr;Mvd;Mvk;Neil1;Ogdhl;Park7;Pcyt2;Pdhb;Pgd;Pmvk;Sucla2;Tkt
c5.go.mf	GOMF_LIGAND_GATED_ION_CHANNEL_ ACTIVITY	Up	7	219	55	13762	8	2.49068e-05	0.00979515	Cnga3; Hcn4; Kcnj14; Kcnj6; P2rx3; Ryr2; Trpm8
c2.cp	KEGG_BUTANOATE_METABOLISM	Down	5	206	25	13762	13.4	2.98018e-05	0.0115453	Aacs; Acat2; Aldh9a1; Hmgcs1; Pdhb
c5.go.bp	GOBP_POTASSIUM_ION_IMPORT_ACROSS_ PLASMA_MEMBRANE	Up	5	219	24	13762	13.1	3.2377e-05	0.0123585	Atp1b1; Hcn4; Kcnj14; Kcnj6; Wnk4
c5.go.cc	GOCC_EXTERNAL_ENCAPSULATING_ STRUCTURE	Up	14	219	243	13762	3.6	3.48755e-05	0.0128691	Aebp1; Bmper; Col11a2; Elfn1; Entpd2; Flrt1; Hapln4; Lamb3; Lrrn3; Mmp24; Ncam1; Sdc3; Serpinf1; Tnr
c5.go.bp	GOBP_STEROL_HOMEOSTASIS	Down	6	206	42	13762	9.5	3.50059e-05	0.0128691	Insig1; Ldlr; Npc2; Soat1; Srebf2; Tmem97
c5.go.cc	GOCC_FICOLIN_1_RICH_GRANULE	Down	10	206	135	13762	4.9	3.5202e-05	0.0128691	Acly; Cat; Ctsb; Dera; Hsp90ab1; Hspa8; Idh1; Ilf2; Prdx4; Vcl
c5.go.bp	GOBP_SECRETION	Down	30	206	910	13762	2.2	3.61528e-05	0.0130331	Aacs; Acly; Camk2a; Cat; Chga; Cnn2; Ctsb; Cyb5r3; Cyp51; Dera; Ezr; F5; Glud1; Gm2a; Gpld1; Hmgcr; Hsp90ab1; Hspa8; Idh1; Ilf2; Maged2; Magt1; Npc2; P2rx4; Park7; Prdx4; Scg5; Slc25a5; Srebf1; Vcl
c5.go.mf	GOMF_CADHERIN_BINDING	Down	14	206	263	13762	3.6	4.23227e-05	0.0150483	Baiap2l1; Cgn; Cnn2; Diaph3; Dock9; Ezr; Hsp90ab1; Hspa8; Idh1; Ktn1; P2rx4; Park7; Plin3; Vcl
c5.go.cc	GOCC_PLASMA_MEMBRANE_REGION	Up	26	219	696	13762	2.3	4.53274e-05	0.0158989	Ager; Aif1l; Arhgap45; Atp1b1; Cacng4; Cavin1; Cxadr; Ddn; Gpr161; Kcnq4; Naip2; Nsg1; P2rx3; Plekha1; Podxl; Ptprh; Ptprs; Scn5a; Shank1; Shank3; Slc16a12; Slc7a11; Slc9a3r2; Spef1; Syne1; Syt7
c5.go.mf	GOMF_DNA_BINDING_TRANSCRIPTION_ FACTOR_ACTIVITY	Up	26	219	697	13762	2.3	4.64286e-05	0.016068	Aebp1; Atf5; Casz1; Elf4; Fev; Foxf1; Gata3; Glis2; Gtf2ird2; Junb; Meis2; Mycl; Nacc2; Rorb; Runx3; Rxra; Satb2; Sox11; Sox6; Tbx1; Tcf7; Zbtb2; Zbtb7c; Zfp516; Zfp62; Zfp672
c5.go.bp	GOBP_POSITIVE_REGULATION_OF_SYNAPTIC_TRANSMISSION_GLUTAMATERGIC	Up	4	219	14	13762	18	5.5105e-05	0.0187206	Cacng4; Shank1; Shank3; Tnr
c5.go.cc	GOCC_CATION_CHANNEL_COMPLEX	Up	9	219	108	13762	5.2	5.55359e-05	0.0187206	Cacng4; Hcn4; Kcnj14; Kcnj6; Kcnk4; Kcnq4; Ryr2; Scn5a; Shank1
c5.go.cc	GOCC_SECRETORY_GRANULE	Down	20	206	497	13762	2.7	5.75292e-05	0.0189745	Acly; Cat; Chga; Cnn2; Ctsb; Cyb5r3; Dbh; Dera; F5; Gm2a; Hsp90ab1; Hspa8; Idh1; Ilf2; Maged2; Magt1; Npc2; Prdx4; Scg5; Vcl
c5.go.bp	GOBP_REGULATION_OF_TRIGLYCERIDE_ BIOSYNTHETIC_PROCESS	Down	4	206	15	13762	17.8	5.84821e-05	0.0189745	Gpld1; Ldlr; Srebf1; Thrsp
c5.go.bp	GOBP_CELLULAR_RESPONSE_TO_STEROL	Down	4	206	15	13762	17.8	5.84821e-05	0.0189745	Aacs; Gpld1; Hmgcs1; Insig1
c2.cp	REACTOME_NEUTROPHIL_DEGRANULATION	Down	15	206	310	13762	3.2	6.71876e-05	0.0215299	Acly;Cat; Cnn2; Ctsb; Cyb5r3; Dera; Gm2a; Hsp90ab1; Hspa8; Idh1; Ilf2; Magt1; Npc2; Prdx4; Vcl
c5.go.bp	GOBP_POSITIVE_REGULATION_OF_ DEVELOPMENTAL_PROCESS	Up	27	219	756	13762	2.2	6.91387e-05	0.0216867	Ager; Bmper; Ccdc71l; Cd74; Cyp26b1; Dscam; Eef1e1; Fst; Gata3; Il6st; Junb; Kalrn; Lrrn3; Map3k5; Mmd; Ppp1r9a; Runx3; Serpinf1; Shank1; Shank3; Sox11; Sox6; Spint1; Syde1; Tbx1; Tph1; Zbtb7c
c5.go.cc	GOCC_ENDOPLASMIC_RETICULUM	Down	38	206	1329	13762	1.9	6.93479e-05	0.0216867	Ambn; Ass1; Bok; Card19; Cat; Cgrrf1; Cln6; Copz1; Cyb5r3; Cyp51; Dbh; Dhcr7; Ebp; Esd; F5; Fads2; Fdft1; Glud1; Hmgcr; Hsd17b7; Insig1; Ktn1; Lss; Magt1; Npc2; Nsdhl; Park7; Pcyt2; Prdx4; Rpn2; Soat1; Sqle; Srebf1; Srebf2; Stard4; Tkt; Tmem97; Txndc16
c5.go.bp	GOBP_POSITIVE_REGULATION_OF_REACTIVE_OXYGEN_SPECIES_BIOSYNTHETIC_PROCESS	Down	5	206	30	13762	11.1	7.52161e-05	0.0232418	Ass1; Hsp90ab1; P2rx4; Park7; Sod2
c5.go.bp	GOBP_SA_NODE_CELL_TO_ATRIAL_CARDIAC_MUSCLE_CELL_SIGNALING	Up	3	219	6	13762	31.4	7.67398e-05	0.0232592	Hcn4; Ryr2; Scn5a
c5.go.bp	GOBP_NADPH_REGENERATION	Down	4	206	16	13762	16.7	7.70646e-05	0.0232592	Dera; Idh1; Pgd; Tkt
c5.go.bp	GOBP_REGULATION_OF_CELL_ DIFFERENTIATION	Up	32	219	985	13762	2	8.67514e-05	0.0258818	Ager; Casz1; Ccdc71l; Cd74; Cyp26b1; Ddx6; Dscam; Dtx1; Fst; Gata3; Id3; Il6st; Junb; Kalrn; Map3k5; Meis2; Mmd; Mycl; Ptprs; Rorb; Runx3; Serpinf1; Shank3; Sox11; Sox6; Spint1; Tbx1; Tcf7; Tnr; Tnrc6c; Tph1; Zbtb7c
c5.go.bp	GOBP_TRICARBOXYLIC_ACID_CYCLE	Down	5	206	31	13762	10.8	8.85971e-05	0.0261321	Idh1; Idh3g; Ogdhl; Pdhb; Sucla2
c5.go.bp	GOBP_MYELOID_LEUKOCYTE_MEDIATED_ IMMUNITY	Down	16	206	357	13762	3	9.49307e-05	0.0276856	Acly; Cat; Chga; Cnn2; Ctsb; Cyb5r3; Dera; Gm2a; Hsp90ab1; Hspa8; Idh1; Ilf2; Magt1; Npc2; Prdx4; Vcl
c5.go.bp	GOBP_CELLULAR_RESPIRATION	Down	10	206	152	13762	4.4	9.61828e-05	0.0277391	Cat; Cox6b1; Idh1; Idh3g; Ndufa8; Ogdhl; Oxa1l; Park7; Pdhb; Sucla2
c5.go.bp	GOBP_CELL_CELL_SIGNALING_INVOLVED_IN_CARDIAC_CONDUCTION	Up	4	219	16	13762	15.7	9.77138e-05	0.027871	Cxadr; Hcn4; Ryr2; Scn5a
c5.go.bp	GOBP_MYELOID_LEUKOCYTE_ACTIVATION	Down	17	206	398	13762	2.9	0.000103127	0.0290953	Acly; Cat; Chga; Cnn2; Ctsb; Cyb5r3; Dera; Gm2a; Hsp90ab1; Hspa8; Idh1; Ilf2; Ldlr; Magt1; Npc2; Prdx4; Vcl
c5.go.bp	GOBP_INORGANIC_ION_IMPORT_ACROSS_ PLASMA_MEMBRANE	Up	6	219	48	13762	7.9	0.000106508	0.0297261	Atp1b1; Cnga3; Hcn4; Kcnj14; Kcnj6; Wnk4
c5.go.bp	GOBP_NEUROGENESIS	Up	34	219	1094	13762	2	0.000121145	0.0334515	Ager; Atf5; Casz1; Chd5; Ddx6; Dscam; Dtx1; Fev; Flrt1; Gata3; Id3; Il6st; Kalrn; Kidins220; Mmd; Mmp24; Mycl; Nav3; Ncam1; Nfasc; Ntrk3; Nyap2; Ppp1r9a; Ptprs; Rorb; Runx3; Satb2; Serpinf1; Shank1; Shank3; Sox11; Sox6; Spint1; Tnr
c5.go.bp	GOBP_POSITIVE_REGULATION_OF_ MULTICELLULAR_ORGANISMAL_PROCESS	Up	27	219	783	13762	2.2	0.000124157	0.0339224	Ager; Aim2; Bmper; Cd274; Cd276; Cd74; Dscam; Fst; G0s2; Gata3; Il6st; Kalrn; Ksr2; Lrrn3; P2rx3; Panx2; Runx3; Ryr2; Serpinf1; Shank3; Sox11; Sox6; Spint1; Syde1; Tnr; Trpm8; Zfp516
c2.cp	REACTOME_CHAPERONE_MEDIATED_ AUTOPHAGY	Down	4	206	18	13762	14.8	0.000126561	0.0342189	Hsp90ab1; Hspa8; Park7; Plin3
c5.go.bp	GOBP_SULFUR_COMPOUND_METABOLIC_ PROCESS	Down	13	206	256	13762	3.4	0.000128096	0.0342769	Acly; Acss2; Esd; Glo1; Hmgcs1; Idh1; Mvd; Mvk; Park7; Pcx; Pdhb; Pmvk; Sucla2
c5.go.bp	GOBP_AV_NODE_CELL_TO_BUNDLE_OF_HIS_ CELL_COMMUNICATION	Up	3	219	7	13762	26.9	0.000132717	0.034448	Cxadr; Ryr2; Scn5a
c5.go.bp	GOBP_SA_NODE_CELL_TO_ATRIAL_CARDIAC_MUSCLE_CELL_COMMUNICATION	Up	3	219	7	13762	26.9	0.000132717	0.034448	Hcn4; Ryr2; Scn5a
c5.go.bp	GOBP_REGULATION_OF_LONG_TERM_ SYNAPTIC_DEPRESSION	Up	3	219	7	13762	26.9	0.000132717	0.034448	Ager; Ppp1r9a; Shank3
c5.go.bp	GOBP_CELL_COMMUNICATION_INVOLVED_IN_CARDIAC_CONDUCTION	Up	5	219	32	13762	9.8	0.000138298	0.0355411	Atp1b1; Cxadr; Hcn4; Ryr2; Scn5a
c5.go.bp	GOBP_SENSORY_PERCEPTION	Up	13	219	243	13762	3.4	0.000140479	0.0357479	Aoc2; Cnga3; Col11a2; Gpr179; Kcnk4; Kcnq4; Mmp24; P2rx3; Rdh5; Rorb; Shank1; Tbx1; Trpm8
c5.go.bp	GOBP_LEUKOCYTE_MEDIATED_IMMUNITY	Down	18	206	449	13762	2.7	0.00014327	0.0361041	Acly; C1ra; Cat; Chga; Cnn2; Ctsb; Cyb5r3; Dbh; Dera; Gm2a; Hsp90ab1; Hspa8; Idh1; Ilf2; Magt1; Npc2; Prdx4; Vcl
c2.cp	KEGG_CELL_ADHESION_MOLECULES_CAMS	Up	6	219	51	13762	7.4	0.000150229	0.0374937	Cd274; Cd276; Madcam1; Ncam1; Nfasc; Sdc3
c5.go.mf	GOMF_PROTEIN_HOMODIMERIZATION_ ACTIVITY	Down	18	206	452	13762	2.7	0.00015563	0.0382777	Bok; Camk2a; Cat; Cln6; Gale; Hmgcs1; Hsp90ab1; Hspb6; Idh1; Impa2; Mvd; Oxa1l; Park7; Ruvbl2; S100a6; Thrsp; Tkt; Tpd52l1
c5.go.bp	GOBP_GENERATION_OF_PRECURSOR_ METABOLITES_AND_ENERGY	Down	16	206	373	13762	2.9	0.000157499	0.0382777	Aacs; Acss2; Cat; Cox6b1; Dera; Idh1; Idh3g; Khk; Ndufa8; Ogdhl; Oxa1l; Park7; Pdhb; Pgd; Sucla2; Tkt
c5.go.bp	GOBP_POSITIVE_REGULATION_OF_CELL_ DIFFERENTIATION	Up	20	219	503	13762	2.5	0.000157795	0.0382777	Ager; Ccdc71l; Cd74; Cyp26b1; Dscam; Gata3; Il6st; Junb; Kalrn; Map3k5; Mmd; Runx3; Serpinf1; Shank3; Sox11; Sox6; Spint1; Tbx1; Tph1; Zbtb7c
c5.go.cc	GOCC_CHROMATIN	Up	25	219	712	13762	2.2	0.000170171	0.0408977	Atf5; Casz1; Chd5; Ddx6; Elf4; Fev; Foxf1; Gata3; Glyr1; Junb; Meis2; Morc2a; Mycl; Nacc2; Ppp1r10; Rorb; Runx3; Rxra; Satb2; Smcr8; Sox11; Sox6; Tbx1; Trnp1; Tspyl4
c5.go.cc	GOCC_MICROBODY	Down	8	206	105	13762	5.1	0.000177118	0.0421768	Cat ;Hmgcr; Idh1; Idi1; Mvk; Pmvk; Pxmp4; Tkt
c5.go.bp	GOBP_TRIGLYCERIDE_METABOLIC_PROCESS	Down	6	206	56	13762	7.2	0.000182073	0.0429625	Cat; Gpld1; Insig1; Ldlr; Srebf1; Thrsp
c5.go.bp	GOBP_LONG_TERM_SYNAPTIC_POTENTIATION	Up	6	219	53	13762	7.1	0.000186508	0.0432781	Ager; Nsg1; Ppp1r9a; Shank1; Shank3; Tnr
c5.go.bp	GOBP_REGULATION_OF_T_CELL_ACTIVATION	Up	10	219	155	13762	4.1	0.000186745	0.0432781	Ager; Cd274; Cd276; Cd74; Cyp26b1; Dtx1; Gata3; Il6st; Runx3; Tcf7
c5.go.mf	GOMF_RIBONUCLEOTIDE_BINDING	Down	38	206	1395	13762	1.8	0.00019064	0.0437898	Aacs; Acly; Acss2; Actr3b; Actr8; Ak1; Anxa6; Arf4; Ass1; Camk1; Camk2a; Cyb5r3; Dapk1; Ddx41; Gem; Glud1; Hmgcr; Hsp90ab1; Hspa8; Idh3g; Itm2b; Khk; Mvd; Mvk; P2rx4; Pbk; Pcx; Pmvk; Psmc1; Psmc6; Renbp; Ruvbl2; Scg5; Soat1; Sucla2; Tubb2a; Tubb2b; Tubg1
c5.go.bp	GOBP_CELL_CELL_ADHESION	Up	18	219	435	13762	2.6	0.000208442	0.047459	Ager; Cd274; Cd276; Cd74; Cxadr; Dscam; Dtx1; Foxf1; Gata3; Il6st; Madcam1; Mmp24; Podxl; Ptprs; Runx3; Scarf2; Slc7a11; Tnr
c5.go.bp	GOBP_CARDIAC_CONDUCTION	Up	7	219	77	13762	5.7	0.000219598	0.0495642	Atp1b1; Cacng4; Cxadr; Hcn4; Kcnj14; Ryr2; Scn5a
System, The Molecular Signatures Database (MSigDB) gene annotation system; MSigDB, gene ontology pathway terms; DEGs, PREPL knock-down induced up- or down-regulated DEGs; Overlap Size, number of overlapping genes between gene ontology pathway terms and DEGs; DEGs Size, number of DEGs; MSigDB size, number of genes associated with the gene ontology pathway term; FE, fold enrichment; P value, P valu…
